# Supplementary material for: Expression of TDRD9 in a subset of lung carcinomas by CpG island hypomethylation protects from DNA damage
Source: Oncotarget. 2017 Nov 27;9(11):9618–31. doi: 10.18632/oncotarget.22709 (PMC5839389; doi:10.18632/oncotarget.22709)
Supplement: Supplementary file 1 [file oncotarget-09-9618-s001.pdf]

## Expression of TDRD9 in a subset of lung carcinomas by CpG island hypomethylation protects from DNA damage

### SUPPLEMENTARY MATERIALS

**Supplementary Table 1: Genes differentially regulated after knockdown of TDRD9 with siTDRD9-1 or siTDRD9-2 in H1993 cells.** Only genes misregulated with both siRNAs are shown. See Supplementary\_Table\_1.

**Supplementary Table 2: Oligonucleotides list**

| Loci      | Forward 5'-3'             | Reverse 5'-3'            | Used for                 |
|-----------|---------------------------|--------------------------|--------------------------|
| TDRD9     | TCAAGAGAATTAGAGAGG        | GGAATGTGTTTCAACACG       | RT-PCR                   |
| PIWIL1    | TGGTTATATTCAGCCTAGGC      | CTTCTGGCTTCCATCAGTGG     | RT-PCR                   |
| PIWIL2    | CACTCCTGGAAGTGTGGTAC      | CTCACCAGCCCATCTCCAAG     | RT-PCR                   |
| PIWIL3    | G TTCAGAGGGTACAGTGGTAC    | CGGTATAACTGAATGGCCTTC    | RT-PCR                   |
| PIWIL4    | CTTGGAACAAGCAGGATCTC      | GGATGGCACCGTCGAATGC      | RT-PCR                   |
| UTR-LINE1 | GAATGATTTTGACGAGCTGAGAGAA | GTCCTCCCGTAGCTCAGAGTAATT | RT-qPCR                  |
| TDRD9     | TGTCTTGGGCCAGAGAGAGT      | TAGGGCTTTTCATGCCACTT     | RT-qPCR                  |
| GAPDH     | GAGTCAACGGATTTGGTCGT      | AATGAAGGGGTCATTGATGG     | RT-PCR and RT-qPCR       |
| CCND2     | GCCACCGACTTTAAGTTTGC      | GCTCACTTCCTCATCCTGCT     | RT-qPCR                  |
| AXL       | CCAGCACCTGTGGTCATCT       | CATCTGAGTGGGCAGGTACA     | RT-qPCR                  |
| CTGF      | GCAGGCTAGAGAAGCAGAGC      | TGGAGATTTTGGGAGTACGG     | RT-qPCR                  |
| CTSV      | GGGAAACATGGCTTCACAAT      | ACAGAGGCTCACGGAACACT     | RT-qPCR                  |
| QKI       | AACTTCTGCGGGATCTTCAA      | ATAGGTCCCACAGCATCAGG     | RT-qPCR                  |
| PBX2      | AAGACATCGGGGACATTCTG      | AAGAGAGCAGGCTTCATTCTG    | RT-qPCR                  |
| HOXB8     | GGAGCTGGAGAAACAGAAGC      | CGGAGATGGAGCAAGTCTTC     | RT-qPCR                  |
| RASSF8    | GGTCAAAGGGGAGATTGACA      | GCCGCAACTCCTTAGTCAAC     | RT-qPCR                  |
| PRKDC     | CCGGACGGACCTACTACGACT     | AGAACGACCTGGGCATCCT      | RT-qPCR                  |
| TDRD9     | TGAGGTTTTAGAAAGGTTTATTTTG | CCAACAACCTCCACATTAATCAC  | CpG island amplification |
| 28S       | CTGGAGAGGCCTCGGGATCC      | TACCCACCCGACCCGTCTTG     | RT-qPCR                  |

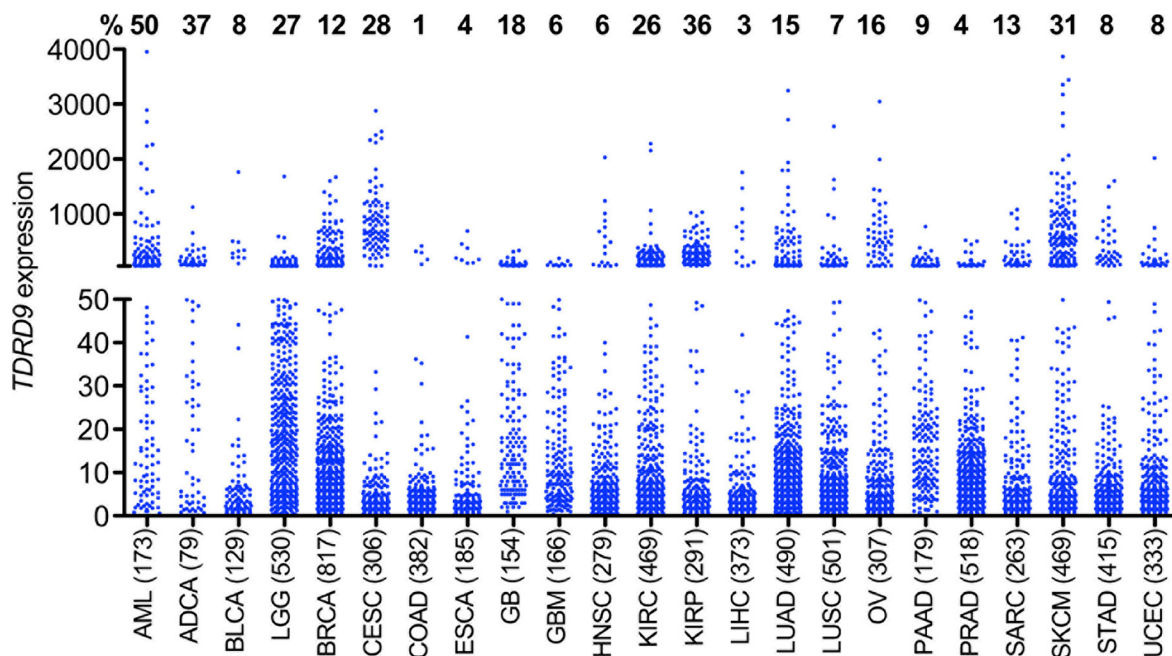

**Supplementary Figure 1: Levels of *TDRD9* transcript in tumors of different types from TCGA.** RNA-seq expression data were obtained from TCGA. Upper numbers are the percentage of tumors with an expression level > 50 (RSEM normalized) for each type of tumor. Abbreviations of the tumors are: AML, acute myeloid leukemia; ADCA, adrenocortical carcinoma; BLCA, bladder urothelial carcinoma; BRCA, breast invasive carcinoma; CESC, cervical squamous cell carcinoma and endocervical adenocarcinoma; COAD, colon adenocarcinoma; ESCA, esophageal carcinoma; GB, glioblastoma; GBM, glioblastoma multiforme; HNSC, head and neck squamous cell carcinoma; KIRC, kidney renal clear cell carcinoma; KIRP, kidney renal papillary cell carcinoma; LGG, brain lower grade glioma; LIHC, liver hepatocellular carcinoma; LUAD, lung adenocarcinoma; LUSC, lung squamous cell carcinoma; OV, ovarian serous cystadenocarcinoma; PAAD, pancreatic adenocarcinoma; PRAD, prostate adenocarcinoma; SARC, sarcoma; SKCM, skin cutaneous melanoma; STAD, stomach adenocarcinoma; UCEC, uterine corpus endometrial carcinoma. Number of tumors in each cohort is shown between brackets.

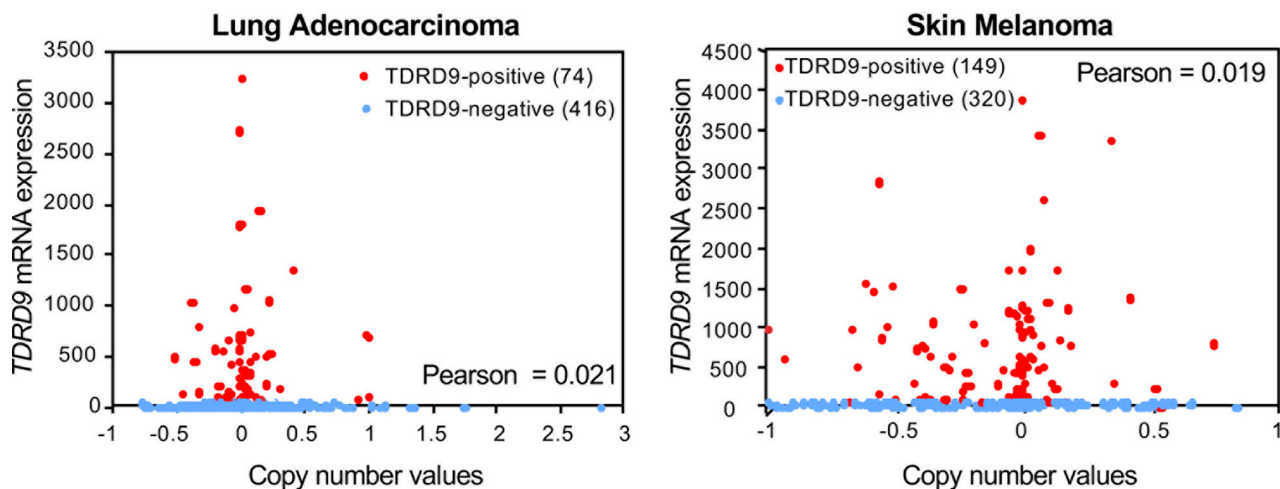

**Supplementary Figure 2: Scatter diagram of copy number versus *TDRD9* gene expression values.** The horizontal axis represents *TDRD9* copy number, and the vertical axis expression of *TDRD9* mRNA (RNA-seq data, RSEM normalized), in TCGA lung adenocarcinomas (TCGA-LUAD) and in TCGA skin melanomas (TCGA-SKCM). Copy number values are TCGA level 3 normalized data, with value 0 representing the diploid state of the region.

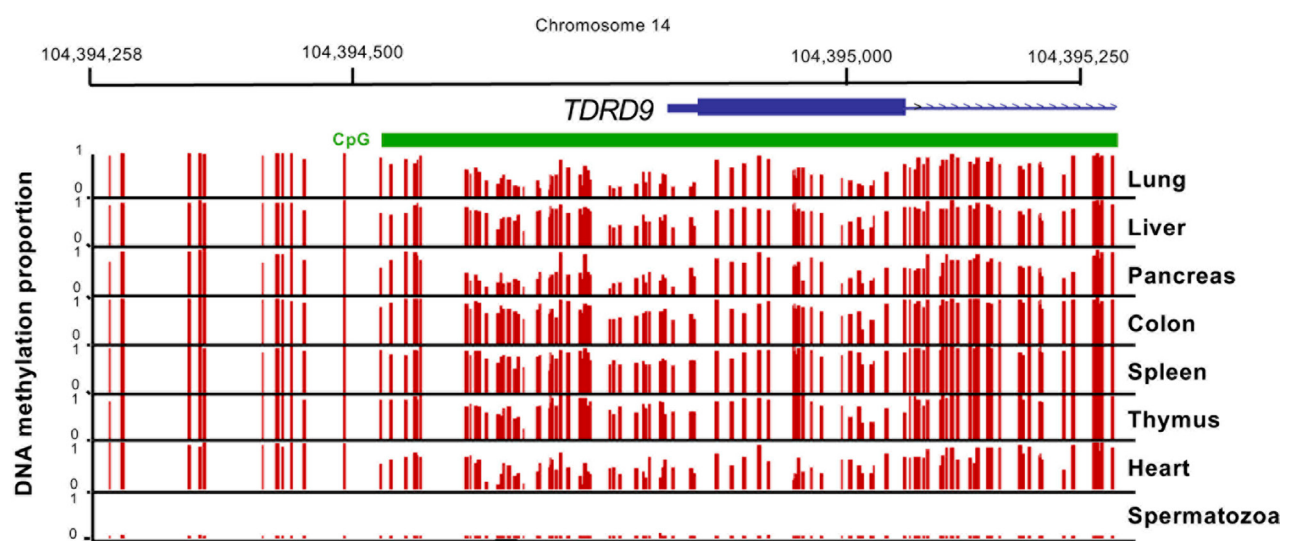

**Supplementary Figure 3: DNA methylation levels of the CpG island in the *TDRD9* promoter from different organs.** Screenshot from UCSC Genome Browser of the *TDRD9* CpG island region showing NIH Roadmap Epigenomics Mapping Consortium CpG methylation data. Fraction of DNA methylation of each CpG pair between 0 (unmethylated) and 1 (fully methylated) is provided.

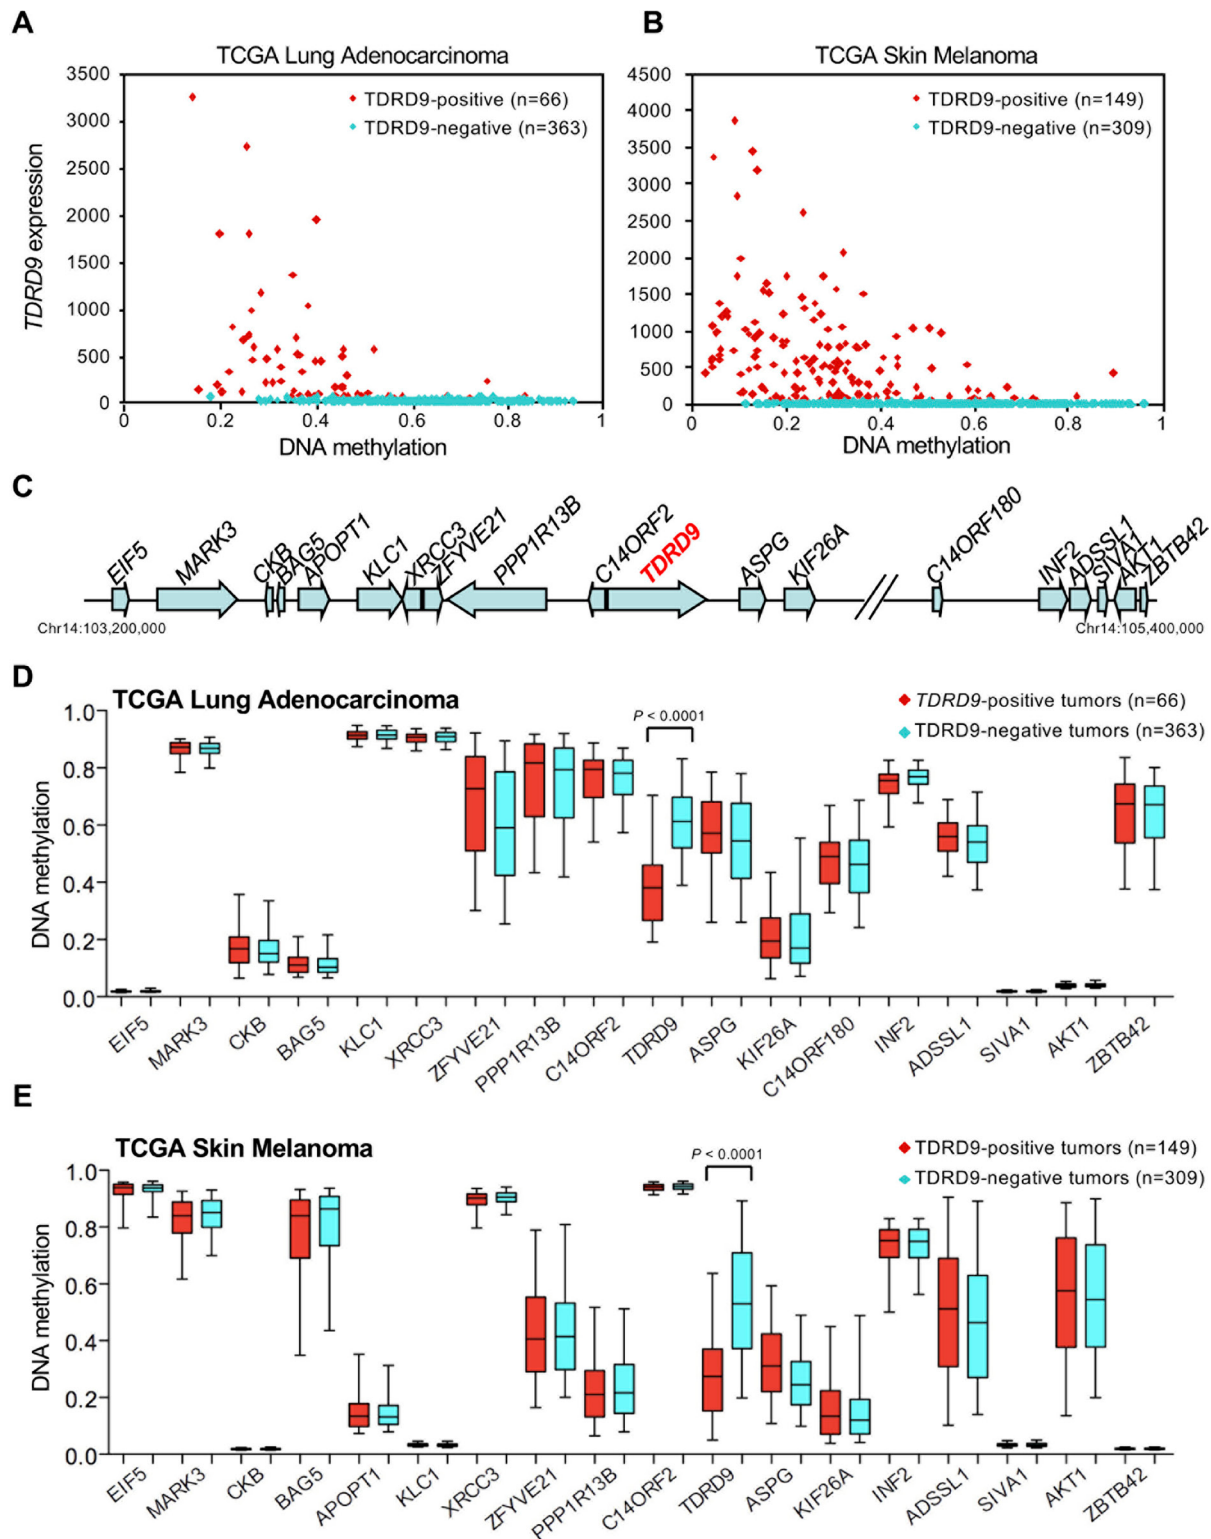

**Supplementary Figure 4: Correlation between expression and methylation levels of the *TDRD9* gene.** *TDRD9* gene expression (RNA-seq data) was associated to hypomethylation of the *TDRD9* CpG island in the TCGA lung adenocarcinoma (A) and the TCGA skin melanoma cohorts (B). Spearman correlation test,  $r = -0.44$ ,  $P < 0.00001$  for lung adenocarcinoma and  $r = -0.54$ ,  $P < 0.00001$  for skin melanoma. TDRD9-positive tumors are presented in red, and TDRD9-negative tumors are shown in blue. (C). Scheme showing gene distribution of the *TDRD9* chromosomal region. (D, E). Boxplots of the methylation levels in 17 genes surrounding *TDRD9* in TDRD9-positive (red) and TDRD9-negative (blue) TCGA lung adenocarcinomas (D) or TCGA skin melanomas (E). Student's *t*-test *P* value is provided when significant. For A, B, D and E, DNA methylation data are provided as the fraction of methylation, which ranges between 0 (unmethylated) and 1 (fully methylated). Significant differences were only observed for the *TDRD9* gene.

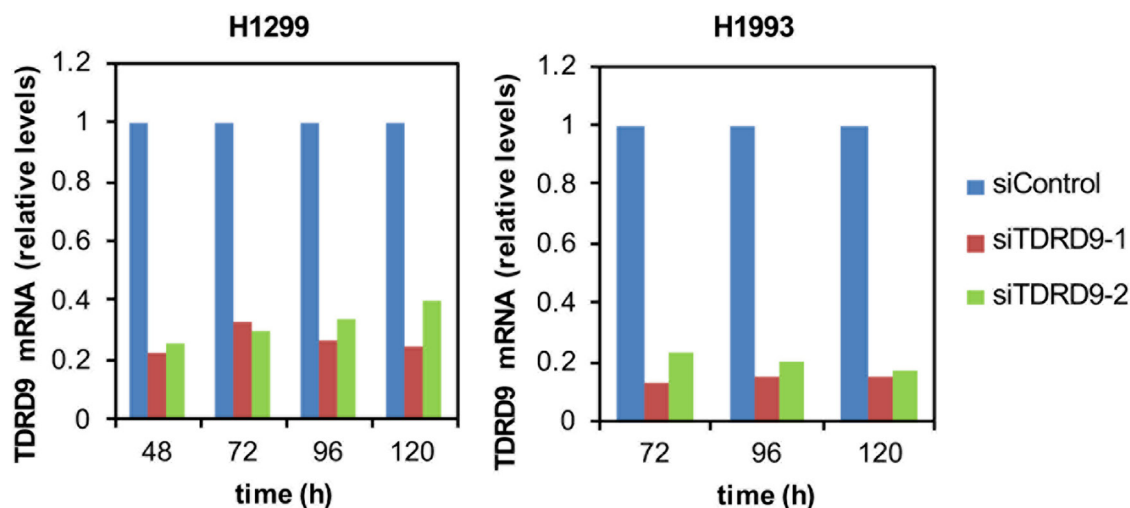

**Supplementary Figure 5: Expression levels of *TDRD9* in H1299 and H1993 cell lines after the transfection of the indicated siRNAs at the indicated time points of the growth curves shown in figure 4B. *TDRD9* mRNA levels were determined by RT-qPCR. Data are the mean of  $n = 6$  qPCR reactions from two independent experiments.**

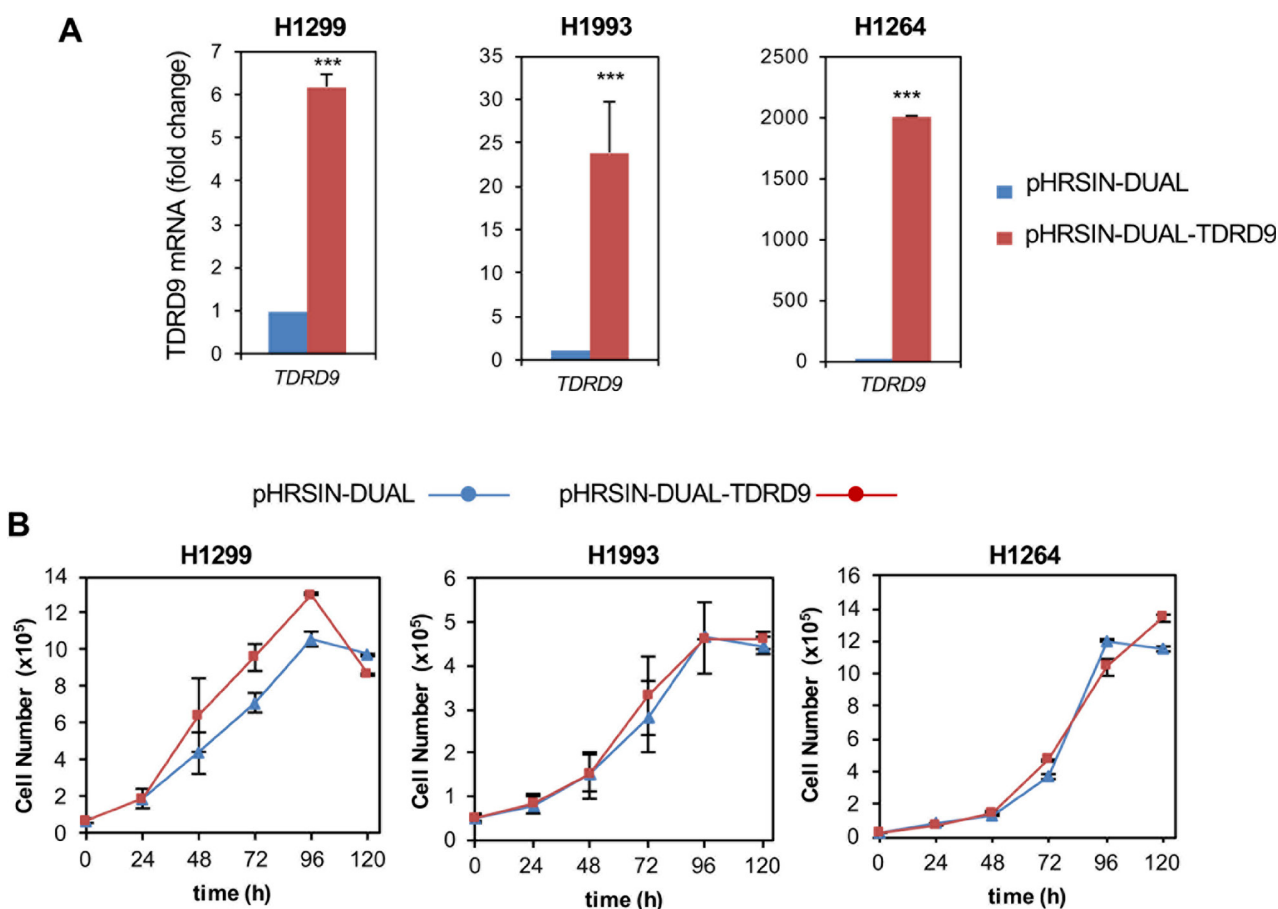

**Supplementary Figure 6: Effect of overexpression of *TDRD9* in cell proliferation. (A).** Levels of *TDRD9* transcript in H1299, H1993 and H1264 cells transduced with *TDRD9*-expressing lentiviral particles (pHRISIN-DUAL-TDRD9). Empty vector (pHRISIN-DUAL) particles were also transduced as control. mRNA levels were determined by RT-qPCR 72 h after transduction. Data are the mean  $\pm$  standard error, of at least  $n = 6$  qPCR reactions from three independent experiments. Significance respect to the control was tested by using Student's  $t$ -test. \*\*\* $P < 0.0001$ . **(B).** Growth curve of H1299, H1993 and H1264 cells transduced with control (pHRISIN-DUAL) or *TDRD9*-expressing (pHRISIN-DUAL-TDRD9) lentiviral particles. Data are the average of three independent experiments. Error bars represent standard error. None of the compared pair of values were significantly different using Student's  $t$ -test.

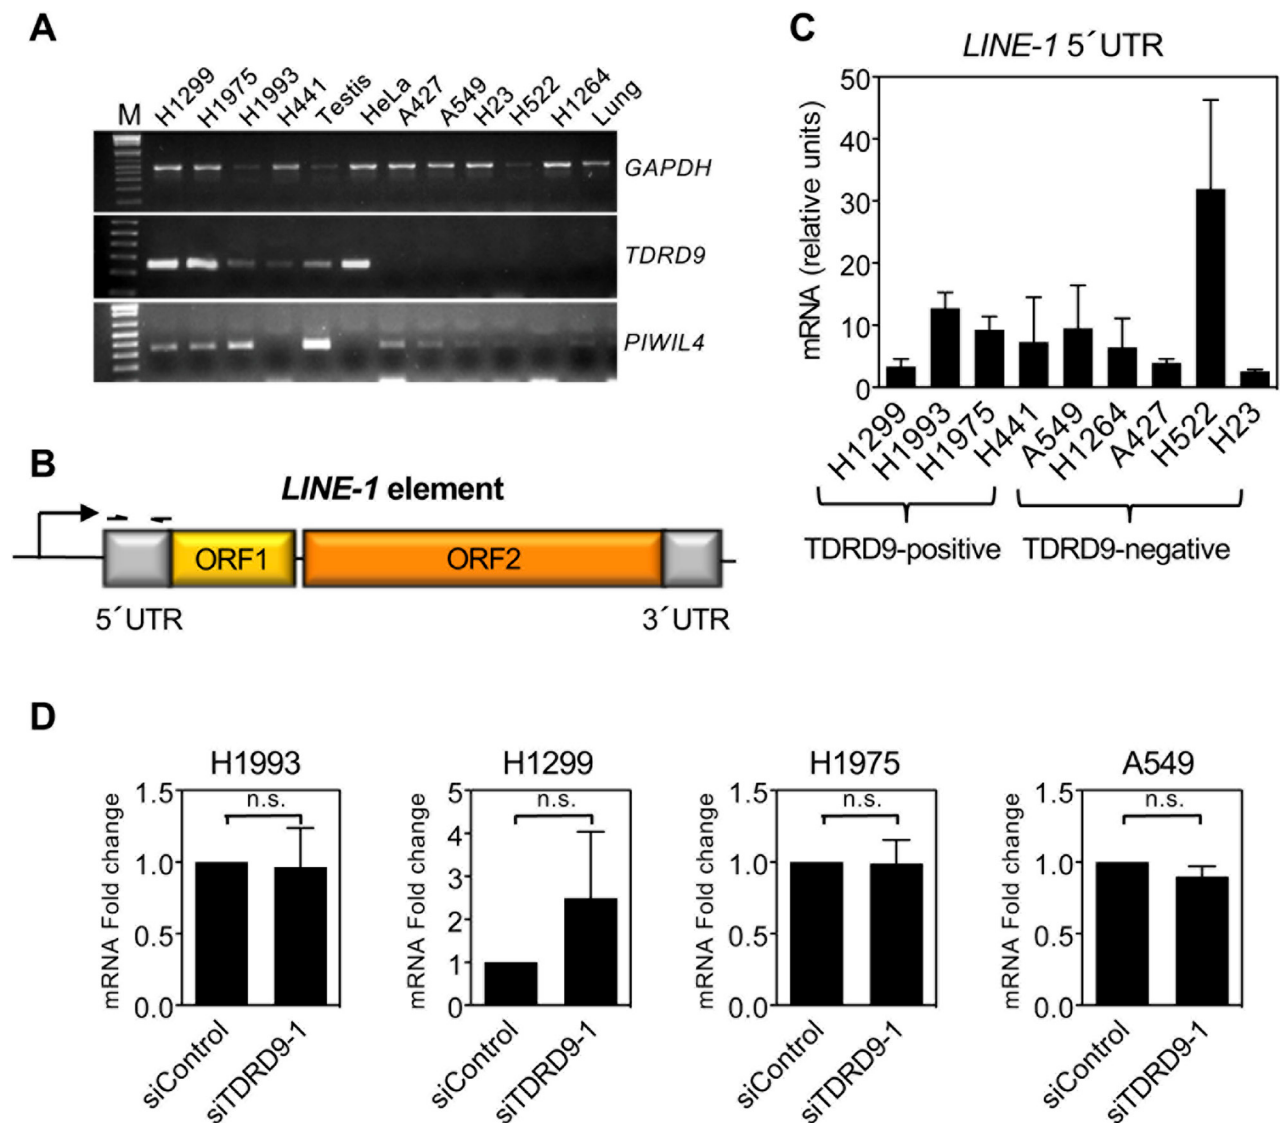

**Supplementary Figure 7: TDRD9 does not control *LINE-1* transcript expression in lung cancer cell lines.** (A) *PIWIL4* expression levels were analyzed by RT-PCR using specific primers. *GAPDH* was used as a loading control and RNA control. The panels corresponding to *GAPDH* and *TDRD9* are the same than in Figure 2A and are included here for comparison. M: 100 bp marker. (B). Scheme of *LINE-1* element showing the primers designed for the RT-qPCR, localized in the 5' UTR region. (C). Expression level of *LINE-1* element in different TDRD9-positive and TDRD9-negative lung cancer cell lines by RT-qPCR. Data are the mean of at least  $n = 6$  qPCR reactions from three independent experiments. Error bars represent  $\pm$  SD values. (D) Effect of the downregulation of TDRD9 expression in the level of *LINE-1* transcript in TDRD9-positive lung cancer cell lines. TDRD9-positive lung cancer cell lines (H1993, H1299, H1975) as well as a TDRD9-negative cell line (A549) were transfected with siControl or siTDRD9-1. The levels of *LINE-1* transcript were determined by RT-qPCR 72 hours after transfection. Data are the mean of at least  $n = 6$  qPCR reactions from three independent experiments. Error bars represent  $\pm$  SD values. None of the compared pair of values were significantly different (n.s.) using Student's *t*-test.

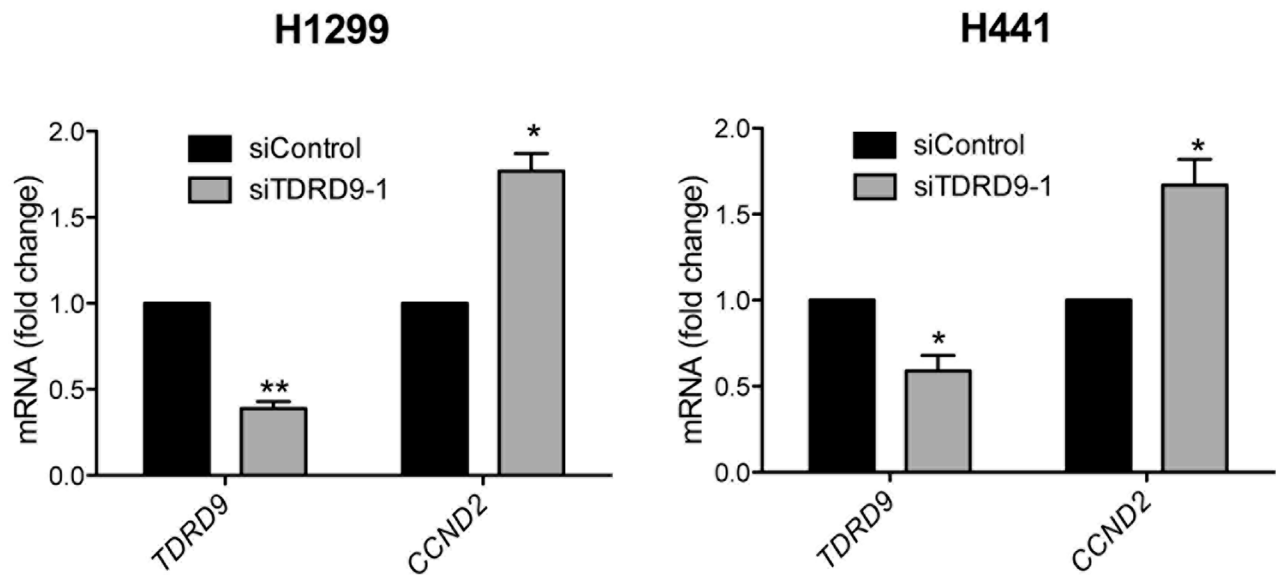

**Supplementary Figure 8: Effect of *TDRD9* knockdown on the expression of *CCND2* gene in H1299 and H441 cell lines.** Expression levels of *TDRD9* were determined as a control. mRNA levels were determined by RT-qPCR. Data are the mean of at least  $n = 6$  qPCR reactions from three independent experiments. Error bars represent standard error. Significance respect to the control was tested by using Student's  $t$ -test. \* $P < 0.01$ .

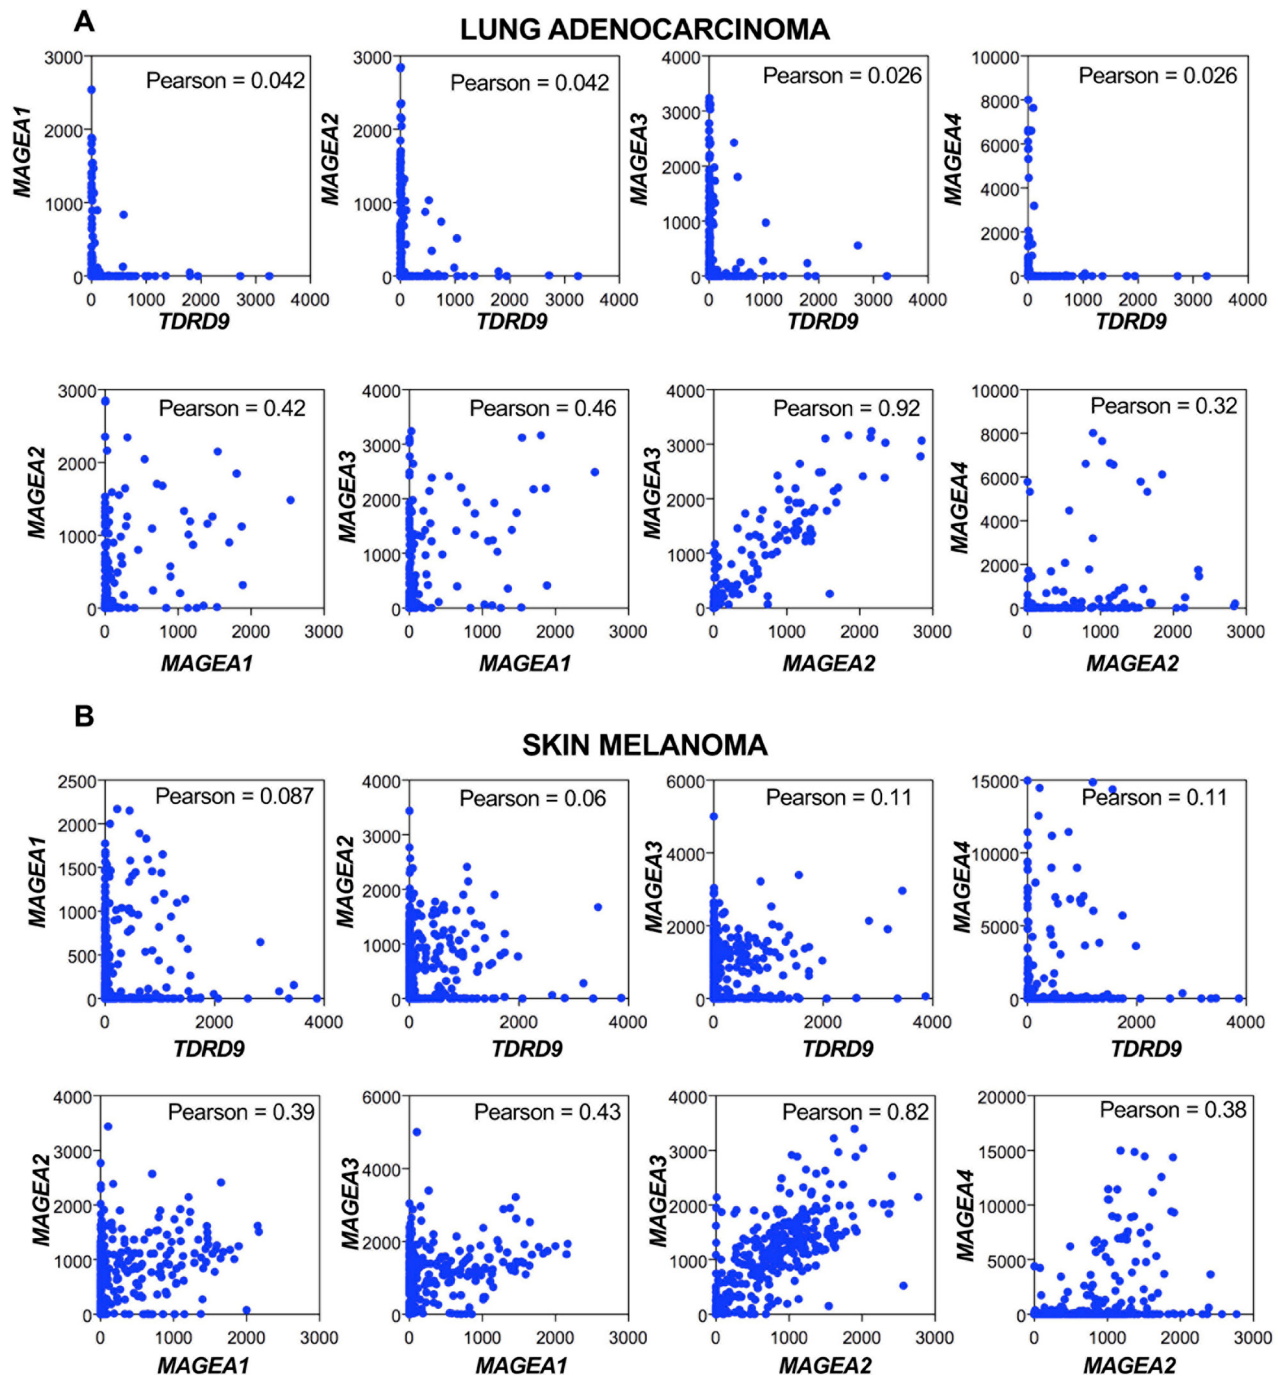

**Supplementary Figure 9: Correlation between levels of expression of *TDRD9* and *MAGEA* genes.** Scatter plots showing correlation between levels of expression (RNA-seq data, RSEM normalization) of the indicated genes in the TCGA lung adenocarcinoma (A) and the TCGA skin melanoma (B) cohorts. Pearson correlation coefficient is shown.
